# Supplementary material
Source: PubMed Central journal article supplement (PMC6208321)
Supplement: NIHMS994081-supplement-Supplemental_tables.pdf [file NIHMS994081-supplement-Supplemental_tables.pdf]

**ASSOCIATION BETWEEN ELECTRONIC CIGARETTE USE AND  
MYOCARDIAL INFARCTION  
Supplemental Tables**

Alzahrani Talal, MD  
Ivan Pena, MD  
Nardos Temesgen, MD  
Stanton A. Glantz, PhD

| <b>Table S1. Sample Characteristics of NHIS 2014</b>                                                                                        |                        |                         |                            |                        |                |
|---------------------------------------------------------------------------------------------------------------------------------------------|------------------------|-------------------------|----------------------------|------------------------|----------------|
|                                                                                                                                             | <b>E-cigarette use</b> |                         |                            |                        | <b>P-value</b> |
|                                                                                                                                             | <b>Never<br/>% (n)</b> | <b>Former<br/>% (n)</b> | <b>Some days<br/>% (n)</b> | <b>Daily<br/>% (n)</b> |                |
| <b>n</b>                                                                                                                                    | 32,069                 | 3,176                   | 892                        | 384                    |                |
| <b>Myocardial infarction</b>                                                                                                                | 3.7% (1,197)           | 3.1% (99)               | 4.4% (39)                  | 6.0% (23)              | 0.02           |
| <b>Cigarette Smoking</b>                                                                                                                    |                        |                         |                            |                        |                |
| Never                                                                                                                                       | 66.2% (21,196)         | 17.2% (547)             | 7.6% (68)                  | 3.4% (13)              | <0.001         |
| Former                                                                                                                                      | 23.0% (7,375)          | 20.2% (639)             | 10.0% (89)                 | 44.4% (170)            |                |
| Some days                                                                                                                                   | 2.9% (911)             | 12.6% (399)             | 18.7% (167)                | 10.2% (39)             |                |
| Daily                                                                                                                                       | 7.9% (2,535)           | 50.0% (1,587)           | 63.7% (568)                | 42.0% (161)            |                |
| <b>Health Status</b>                                                                                                                        |                        |                         |                            |                        |                |
| Hypertension                                                                                                                                | 34.7% (11,108)         | 25.9% (821)             | 28.3% (252)                | 36.5% (140)            | <0.001         |
| Diabetes Mellitus                                                                                                                           | 10.9% (3,504)          | 6.3% (199)              | 7.6% (68)                  | 9.9% (38)              | <0.001         |
| High Cholesterol                                                                                                                            | 30.9% (9,863)          | 22.1% (699)             | 21.4% (190)                | 31.2% (119)            | <0.001         |
| <b>Demographics</b>                                                                                                                         |                        |                         |                            |                        |                |
| Woman                                                                                                                                       | 56.3% (18,061)         | 48.1% (1,527)           | 50.1% (447)                | 47.9% (184)            | <0.001         |
| Age, year ( $\pm$ SD)                                                                                                                       | 50.6 ( $\pm$ 18.31)    | 39.0 ( $\pm$ 14.81)     | 40.9 ( $\pm$ 15.22)        | 44.3 ( $\pm$ 15.08)    | <0.001         |
| BMI ( $\pm$ SD) kg/m <sup>2</sup>                                                                                                           | 30.38 ( $\pm$ 14.42)   | 29.19 ( $\pm$ 11.82)    | 29.35 ( $\pm$ 12.88)       | 29.64 ( $\pm$ 12.67)   | <0.001         |
| <b>Race/Ethnicity</b>                                                                                                                       |                        |                         |                            |                        |                |
| Hispanic                                                                                                                                    | 17.3% (5,531)          | 11.8% (374)             | 9.8% (96)                  | 7.6% (29)              | <0.001         |
| White                                                                                                                                       | 61.2% (19,614)         | 73.4% (2,332)           | 77.5% (678)                | 81.0% (311)            |                |
| Black                                                                                                                                       | 14.5% (4,638)          | 9.1% (290)              | 8.0% (77)                  | 6.5% (25)              |                |
| Asian                                                                                                                                       | 6.1% (1,944)           | 3.5% (112)              | 2.6% (22)                  | 2.9% (11)              |                |
| Other                                                                                                                                       | 1.1% (342)             | 2.1% (68)               | 2.1% (19)                  | 2.1% (8)               |                |
| P values test the null hypothesis that there are no differences across the groups using analysis of variance or chi-square, as appropriate. |                        |                         |                            |                        |                |

**Table S2. Sample Characteristics of NIHS 2016**

|                                                                                                                                             | E-cigarette use      |                      |                      |                      | P-value |
|---------------------------------------------------------------------------------------------------------------------------------------------|----------------------|----------------------|----------------------|----------------------|---------|
|                                                                                                                                             | Never<br>% (n)       | Former<br>% (n)      | Some days<br>% (n)   | Daily<br>% (n)       |         |
| <b>n</b>                                                                                                                                    | 28,031               | 3,917                | 591                  | 392                  |         |
| <b>Myocardial infarction</b>                                                                                                                | 4.0% (1,112)         | 3.2% (126)           | 3.7% (22)            | 6.1% (24)            | 0.015   |
| <b>Cigarette Smoking</b>                                                                                                                    |                      |                      |                      |                      |         |
| Never                                                                                                                                       | 65.9% (18,453)       | 22.1% (866)          | 11.5% (68)           | 7.1% (28)            | <0.001  |
| Former                                                                                                                                      | 24.9% (6,983)        | 21.7% (847)          | 16.1% (95)           | 58.4% (229)          |         |
| Some days                                                                                                                                   | 2.4% (670)           | 10.7% (417)          | 15.8% (93)           | 12.0% (47)           |         |
| Daily                                                                                                                                       | 6.8% (1,902)         | 45.6% (1,783)        | 56.6% (334)          | 22.5% (88)           |         |
| <b>Health Status</b>                                                                                                                        |                      |                      |                      |                      |         |
| Hypertension                                                                                                                                | 36.7% (10,279)       | 27.2% (1,066)        | 29.4% (174)          | 30.4% (119)          | <0.001  |
| Diabetes Mellitus                                                                                                                           | 11.2% (3,138)        | 7.3% (286)           | 9.3% (55)            | 8.4% (33)            | <0.001  |
| High Cholesterol                                                                                                                            | 31.5% (8,792)        | 23.4% (913)          | 27.2% (160)          | 31.0% (121)          | <0.001  |
| <b>Demographics</b>                                                                                                                         |                      |                      |                      |                      |         |
| Woman                                                                                                                                       | 55.8% (15,637)       | 48.4% (1,895)        | 46.5% (275)          | 46.7% (183)          | <0.001  |
| Age, year ( $\pm$ SD)                                                                                                                       | 52.5 ( $\pm$ 18.62)  | 40.7 ( $\pm$ 15.34)  | 42.3 ( $\pm$ 15.24)  | 44.0 ( $\pm$ 15.54)  | <0.001  |
| BMI ( $\pm$ SD) kg/m <sup>2</sup>                                                                                                           | 30.40 ( $\pm$ 14.39) | 29.37 ( $\pm$ 12.06) | 29.26 ( $\pm$ 11.85) | 29.73 ( $\pm$ 12.43) | <0.001  |
| <b>Race/Ethnicity</b>                                                                                                                       |                      |                      |                      |                      |         |
| Hispanic                                                                                                                                    | 12.1% (3,404)        | 8.6% (335)           | 7.3% (43)            | 3.6% (14)            | <0.001  |
| White                                                                                                                                       | 69.4% (19,457)       | 78.0% (3,055)        | 77.8% (460)          | 85.5% (335)          |         |
| Black                                                                                                                                       | 11.5% (3,233)        | 8.7% (341)           | 8.1% (48)            | 3.8% (15)            |         |
| Asian                                                                                                                                       | 5.5% (1,537)         | 2.8% (110)           | 3.1% (18)            | 3.8% (15)            |         |
| Other                                                                                                                                       | 1.4% (400)           | 1.9% (76)            | 3.7% (22)            | 3.3% (13)            |         |
| P values test the null hypothesis that there are no differences across the groups using analysis of variance or chi-square, as appropriate. |                      |                      |                      |                      |         |

**Table S3. Univariate and Multivariate Associations between E-cigarette Use and Myocardial Infarction of NHIS 2014**

| <b>Model</b>              | <b>Unadjusted Model</b> |                | <b>Adjusted Model</b> |                |
|---------------------------|-------------------------|----------------|-----------------------|----------------|
| <b>Characteristics</b>    | <b>OR (95% CI)</b>      | <b>P-value</b> | <b>OR (95% CI)</b>    | <b>P-value</b> |
| <b>E-cig use:</b>         |                         |                |                       |                |
| Never                     | Reference               |                | Reference             |                |
| Former                    | 0.92 (0.69-1.22)        | 0.552          | 1.19 (0.86-1.65)      | 0.281          |
| Some days                 | 1.64 (1.03-2.61)        | 0.037          | 1.71 (1.04-2.84)      | 0.036          |
| Daily                     | 2.49 (1.29-4.78)        | 0.006          | 2.28 (1.07-4.85)      | 0.033          |
| <b>Cigarette Smoking</b>  |                         |                |                       |                |
| Never                     |                         |                | Reference             |                |
| Former                    |                         |                | 1.89 (1.56-2.28)      | <0.001         |
| Some days                 |                         |                | 2.42 (1.55-3.76)      | <0.001         |
| Daily                     |                         |                | 2.91 (2.17-3.90)      | <0.001         |
| <b>Hypertension</b>       |                         |                |                       |                |
|                           |                         |                | 2.83 (2.26-3.53)      | <0.001         |
| <b>Diabetes Mellitus</b>  |                         |                |                       |                |
|                           |                         |                | 1.76 (1.44-2.15)      | <0.001         |
| <b>High Cholesterol</b>   |                         |                |                       |                |
|                           |                         |                | 2.19 (1.80-2.66)      | <0.001         |
| <b>Woman</b>              |                         |                |                       |                |
|                           |                         |                | 0.52 (0.44-0.63)      | <0.001         |
| <b>Age (per 10 years)</b> |                         |                |                       |                |
|                           |                         |                | 1.60 (1.50-1.71)      | <0.001         |
| <b>BMI</b>                |                         |                |                       |                |
|                           |                         |                | 1.00 (1.00-1.01)      | 0.621          |
| <b>Race/ethnicity</b>     |                         |                |                       |                |
| White                     |                         |                | Reference             |                |
| Hispanic                  |                         |                | 0.72 (0.54-0.96)      | 0.024          |
| Black                     |                         |                | 0.96 (0.74-1.25)      | 0.782          |
| Asian                     |                         |                | 0.67 (0.41-1.07)      | 0.095          |
| Other Race                |                         |                | 1.40 (0.72-2.71)      | 0.324          |
| <b>n</b>                  | 36,495                  |                | 36,294                |                |

**Table S4. Univariate and Multivariate Associations between E-cigarette Use and Myocardial Infarction of NHIS 2016**

| <b>Model</b>              | <b>Unadjusted Model</b> |                | <b>Adjusted Model</b> |                |
|---------------------------|-------------------------|----------------|-----------------------|----------------|
| <b>Characteristics</b>    | <b>OR (95% CI)</b>      | <b>P-value</b> | <b>OR (95% CI)</b>    | <b>P-value</b> |
| <b>E-cig use:</b>         |                         |                |                       |                |
| Never                     | Reference               |                | Reference             |                |
| Former                    | 0.79 (0.61-1.02)        | 0.072          | 1.01 (0.73-1.38)      | 0.974          |
| Some days                 | 0.75 (0.44-1.27)        | 0.282          | 0.80 (0.43-1.49)      | 0.483          |
| Daily                     | 1.73 (1.04-2.86)        | 0.034          | 2.10 (1.20-3.40)      | 0.010          |
| <b>Cigarette Smoking</b>  |                         |                |                       |                |
| Never                     |                         |                | Reference             |                |
| Former                    |                         |                | 1.62 (1.36-1.92)      | <0.001         |
| Some days                 |                         |                | 2.08 (1.38-3.12)      | <0.001         |
| Daily                     |                         |                | 2.83 (2.18-3.67)      | <0.001         |
| <b>Hypertension</b>       |                         |                |                       |                |
|                           |                         |                | 2.16 (1.78-2.61)      | <0.001         |
| <b>Diabetes Mellitus</b>  |                         |                |                       |                |
|                           |                         |                | 1.83 (1.50-2.23)      | <0.001         |
| <b>High Cholesterol</b>   |                         |                |                       |                |
|                           |                         |                | 2.49 (2.08-2.99)      | <0.001         |
| <b>Woman</b>              |                         |                |                       |                |
|                           |                         |                | 0.46 (0.39-0.54)      | <0.001         |
| <b>Age (per 10 years)</b> |                         |                |                       |                |
|                           |                         |                | 1.69 (1.57-1.83)      | <0.001         |
| <b>BMI</b>                |                         |                |                       |                |
|                           |                         |                | 1.00 (0.99-1.01)      | 0.504          |
| <b>Race/ethnicity</b>     |                         |                |                       |                |
| White                     |                         |                | Reference             |                |
| Hispanic                  |                         |                | 0.98 (0.71-1.36)      | 0.921          |
| Black                     |                         |                | 0.83 (0.64-1.08)      | 0.170          |
| Asian                     |                         |                | 0.38 (0.21-0.69)      | 0.001          |
| Other Race                |                         |                | 1.43 (0.67-3.05)      | 0.358          |
| <b>n</b>                  | 32,900                  |                | 32,752                |                |
